# Supplementary material for: A Waterborne Epoxy Composite Coating with Smart Corrosion Resistance Based on 2-Phenylbenzimidazole-5-sulfonic Acid/Layered Double Hydroxide Composite
Source: MDPI journal article supplement (doi:10.3390/molecules28135199), 2023-07-04
Supplement: s1 [file s1]

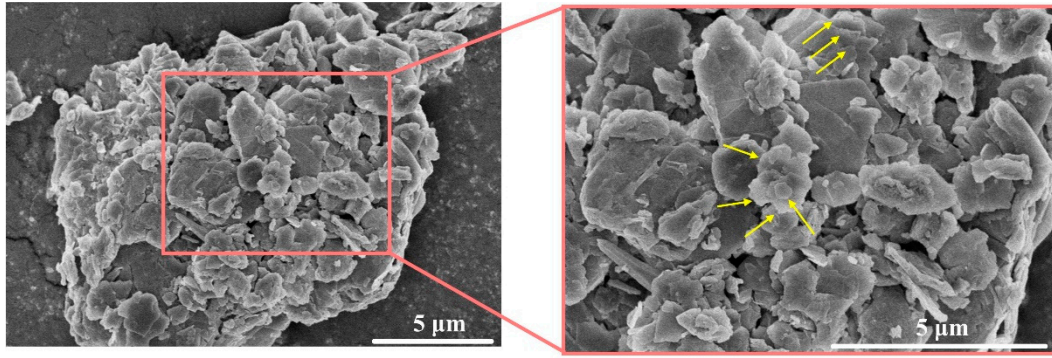

**Figure S1** SEM images of ZnAl-NO<sub>3</sub><sup>-</sup>-LDH

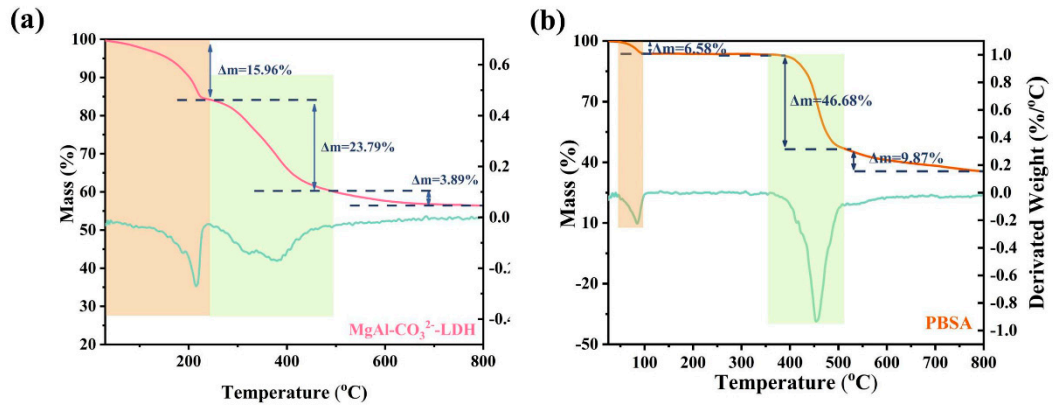

**Figure S2** TG-DTG curves of (a) MgAl-CO<sub>3</sub><sup>2-</sup>-LDH and (b) PBSA.

**Table S1.** The parameters obtained from the fitting of EIS data are related to the uncoated samples exposed to the blank and inhibited solutions.

| Specimens                               | Rs<br>(Ω·cm <sup>2</sup> ) | CPE <sub>c</sub>                                          |   | R <sub>f</sub><br>(Ω·cm <sup>2</sup> ) | C <sub>f</sub><br>(F·cm <sup>-2</sup> ) | CPE <sub>dl</sub>                                          |      | R <sub>ct</sub><br>(Ω·cm <sup>2</sup> ) | C <sub>dl</sub><br>(F·cm <sup>-2</sup> ) | log Z <br>(Ω·cm <sup>2</sup> ) | Chi squared           |
|-----------------------------------------|----------------------------|-----------------------------------------------------------|---|----------------------------------------|-----------------------------------------|------------------------------------------------------------|------|-----------------------------------------|------------------------------------------|--------------------------------|-----------------------|
|                                         |                            | Y <sub>c</sub><br>(F·cm <sup>-2</sup> ·s <sup>n-1</sup> ) | n |                                        |                                         | Y <sub>dl</sub><br>(F·cm <sup>-2</sup> ·s <sup>n-1</sup> ) | n    |                                         |                                          |                                |                       |
| NaCl-1H                                 | 24.51                      | -                                                         | - | -                                      | -                                       | 4.91×10 <sup>-4</sup>                                      | 0.76 | 3453                                    | 1.20×10 <sup>-4</sup>                    | 3.45                           | 3.01×10 <sup>-3</sup> |
| NaCl-24H                                | 25.09                      | -                                                         | - | -                                      | -                                       | 3.02×10 <sup>-4</sup>                                      | 0.75 | 3314                                    | 5.97×10 <sup>-5</sup>                    | 3.55                           | 4.51×10 <sup>-3</sup> |
| NaCl-48H                                | 25.39                      | -                                                         | - | -                                      | -                                       | 3.51×10 <sup>-4</sup>                                      | 0.74 | 2958                                    | 6.86×10 <sup>-5</sup>                    | 3.49                           | 3.32×10 <sup>-3</sup> |
| NaCl-72H                                | 24.32                      | -                                                         | - | -                                      | -                                       | 4.82×10 <sup>-4</sup>                                      | 0.72 | 3203                                    | 8.60×10 <sup>-5</sup>                    | 3.50                           | 2.04×10 <sup>-3</sup> |
| MgAl-CO <sub>3</sub> <sup>2-</sup> -1H  | 25.70                      | -                                                         | - | -                                      | -                                       | 3.34×10 <sup>-4</sup>                                      | 0.77 | 3201                                    | 8.13×10 <sup>-5</sup>                    | 3.50                           | 2.06×10 <sup>-3</sup> |
| MgAl-CO <sub>3</sub> <sup>2-</sup> -24H | 27.53                      | -                                                         | - | -                                      | -                                       | 3.17×10 <sup>-4</sup>                                      | 0.77 | 3617                                    | 7.48×10 <sup>-5</sup>                    | 3.55                           | 1.15×10 <sup>-3</sup> |

|                                         |       |                       |      |                      |                       |                       |      |      |                       |      |                       |
|-----------------------------------------|-------|-----------------------|------|----------------------|-----------------------|-----------------------|------|------|-----------------------|------|-----------------------|
| MgAl-CO <sub>3</sub> <sup>2-</sup> -48H | 25.81 | -                     | -    | -                    | -                     | 4.05×10 <sup>-4</sup> | 0.76 | 3658 | 9.69×10 <sup>-5</sup> | 3.54 | 6.59×10 <sup>-4</sup> |
| MgAl-CO <sub>3</sub> <sup>2-</sup> -72H | 24.63 | -                     | -    | -                    | -                     | 5.05×10 <sup>-4</sup> | 0.76 | 4772 | 1.24×10 <sup>-4</sup> | 3.62 | 5.59×10 <sup>-4</sup> |
| ZnAl-NO <sub>3</sub> <sup>-</sup> -1H   | 25.15 | -                     | -    | -                    | -                     | 2.27×10 <sup>-4</sup> | 0.84 | 8048 | 8.43×10 <sup>-5</sup> | 3.87 | 3.12×10 <sup>-4</sup> |
| ZnAl-NO <sub>3</sub> <sup>-</sup> -24H  | 24.95 | -                     | -    | -                    | -                     | 2.63×10 <sup>-4</sup> | 0.86 | 3789 | 1.18×10 <sup>-4</sup> | 3.55 | 4.64×10 <sup>-4</sup> |
| ZnAl-NO <sub>3</sub> <sup>-</sup> -48H  | 26.00 | -                     | -    | -                    | -                     | 4.08×10 <sup>-4</sup> | 0.84 | 4697 | 1.76×10 <sup>-4</sup> | 3.65 | 5.70×10 <sup>-4</sup> |
| ZnAl-NO <sub>3</sub> <sup>-</sup> -72H  | 28.18 | -                     | -    | -                    | -                     | 7.19×10 <sup>-4</sup> | 0.83 | 5454 | 3.17×10 <sup>-4</sup> | 3.67 | 1.51×10 <sup>-3</sup> |
| ZnAl-PBSA-1H                            | 27.35 | 2.28×10 <sup>-4</sup> | 0.81 | 5.33×10 <sup>2</sup> | 1.38×10 <sup>-4</sup> | 1.28×10 <sup>-5</sup> | 0.98 | 5915 | 1.13×10 <sup>-5</sup> | 3.77 | 4.05×10 <sup>-4</sup> |
| ZnAl-PBSA-24H                           | 28.16 | 8.78×10 <sup>-5</sup> | 0.88 | 1.47×10 <sup>3</sup> | 6.66×10 <sup>-5</sup> | 5.79×10 <sup>-5</sup> | 0.70 | 6870 | 3.84×10 <sup>-6</sup> | 3.90 | 2.44×10 <sup>-4</sup> |
| ZnAl-PBSA-48H                           | 28.15 | 9.41×10 <sup>-5</sup> | 0.87 | 1.70×10 <sup>3</sup> | 7.20×10 <sup>-5</sup> | 5.51×10 <sup>-5</sup> | 0.81 | 3500 | 1.26×10 <sup>-5</sup> | 3.68 | 6.12×10 <sup>-4</sup> |
| ZnAl-PBSA-72H                           | 28.81 | 1.11×10 <sup>-4</sup> | 0.86 | 2.95×10 <sup>3</sup> | 9.17×10 <sup>-5</sup> | 9.61×10 <sup>-5</sup> | 0.77 | 3000 | 1.57×10 <sup>-5</sup> | 3.76 | 3.24×10 <sup>-4</sup> |

**Table S2.** The parameters obtained from the fitting of EIS data related to the coated samples immersed in 3.5 wt.% NaCl solution.

| Specimens       | CPE <sub>c</sub>                        |      | R <sub>f</sub><br>(Ω·cm <sup>2</sup> ) | CPE <sub>dl</sub>                       |      | R <sub>ct</sub><br>(Ω·cm <sup>2</sup> ) | Log  Z <br>(Ω·cm <sup>2</sup> ) | Chi squared           |
|-----------------|-----------------------------------------|------|----------------------------------------|-----------------------------------------|------|-----------------------------------------|---------------------------------|-----------------------|
|                 | Y <sub>c</sub>                          | n    |                                        | Y <sub>dl</sub>                         | n    |                                         |                                 |                       |
|                 | (F·cm <sup>-2</sup> ·s <sup>n-1</sup> ) |      |                                        | (F·cm <sup>-2</sup> ·s <sup>n-1</sup> ) |      |                                         |                                 |                       |
| Blank WEP-1day  | 1.83×10 <sup>-10</sup>                  | 0.98 | 3.26×10 <sup>6</sup>                   | 5.93×10 <sup>-9</sup>                   | 0.81 | 4.69×10 <sup>7</sup>                    | 7.63                            | 3.86×10 <sup>-3</sup> |
| Blank WEP-10day | 2.62×10 <sup>-10</sup>                  | 0.95 | 4.57×10 <sup>6</sup>                   | 1.90×10 <sup>-7</sup>                   | 0.45 | 3.06×10 <sup>7</sup>                    | 7.22                            | 6.05×10 <sup>-3</sup> |
| Blank WEP-20day | 2.19×10 <sup>-10</sup>                  | 0.96 | 2.00×10 <sup>6</sup>                   | 7.15×10 <sup>-8</sup>                   | 0.24 | 2.00×10 <sup>7</sup>                    | 7.28                            | 3.56×10 <sup>-3</sup> |
| Blank WEP-30day | 1.65×10 <sup>-10</sup>                  | 0.99 | 1.50×10 <sup>6</sup>                   | 2.56×10 <sup>-8</sup>                   | 0.38 | 1.60×10 <sup>7</sup>                    | 7.36                            | 2.56×10 <sup>-3</sup> |
| 4-ZPL/WEP-1day  | 2.38×10 <sup>-10</sup>                  | 0.98 | 8.32×10 <sup>8</sup>                   | 2.02×10 <sup>-10</sup>                  | 0.58 | 1.68×10 <sup>10</sup>                   | 10.04                           | 1.28×10 <sup>-3</sup> |
| 4-ZPL/WEP-10day | 2.41×10 <sup>-10</sup>                  | 0.98 | 1.50×10 <sup>7</sup>                   | 3.70×10 <sup>-10</sup>                  | 0.45 | 1.16×10 <sup>9</sup>                    | 9.02                            | 1.41×10 <sup>-3</sup> |
| 4-ZPL/WEP-20day | 2.89×10 <sup>-10</sup>                  | 0.97 | 1.30×10 <sup>7</sup>                   | 7.46×10 <sup>-10</sup>                  | 0.21 | 1.00×10 <sup>9</sup>                    | 8.85                            | 1.31×10 <sup>-3</sup> |
| 4-ZPL/WEP-30day | 2.82×10 <sup>-10</sup>                  | 0.98 | 1.25×10 <sup>7</sup>                   | 1.07×10 <sup>-9</sup>                   | 0.27 | 8.00×10 <sup>8</sup>                    | 8.89                            | 5.48×10 <sup>-3</sup> |

|                 |                        |      |                    |                        |      |                       |       |                       |
|-----------------|------------------------|------|--------------------|------------------------|------|-----------------------|-------|-----------------------|
| 6-ZPL/WEP-1day  | $1.66 \times 10^{-10}$ | 0.98 | $8.00 \times 10^8$ | $1.36 \times 10^{-10}$ | 0.58 | $1.20 \times 10^{10}$ | 10.01 | $1.19 \times 10^{-3}$ |
| 6-ZPL/WEP-10day | $1.58 \times 10^{-10}$ | 0.99 | $2.71 \times 10^7$ | $2.10 \times 10^{-10}$ | 0.61 | $1.40 \times 10^9$    | 9.13  | $9.97 \times 10^{-4}$ |
| 6-ZPL/WEP-20day | $1.61 \times 10^{-10}$ | 0.99 | $2.60 \times 10^7$ | $2.30 \times 10^{-10}$ | 0.62 | $1.53 \times 10^9$    | 9.14  | $1.43 \times 10^{-3}$ |
| 6-ZPL/WEP-30day | $1.63 \times 10^{-10}$ | 0.99 | $2.52 \times 10^7$ | $2.48 \times 10^{-10}$ | 0.63 | $1.80 \times 10^9$    | 9.24  | $1.07 \times 10^{-3}$ |
| 8-ZPL/WEP-1day  | $2.55 \times 10^{-10}$ | 0.99 | $1.82 \times 10^7$ | $3.06 \times 10^{-8}$  | 0.47 | $6.86 \times 10^7$    | 7.80  | $2.93 \times 10^{-3}$ |
| 8-ZPL/WEP-10day | $3.33 \times 10^{-10}$ | 0.97 | $2.80 \times 10^6$ | $4.09 \times 10^{-8}$  | 0.24 | $4.20 \times 10^7$    | 7.38  | $4.00 \times 10^{-3}$ |
| 8-ZPL/WEP-20day | $2.96 \times 10^{-10}$ | 0.98 | $2.70 \times 10^6$ | $2.67 \times 10^{-8}$  | 0.37 | $4.10 \times 10^7$    | 7.51  | $4.24 \times 10^{-3}$ |
| 8-ZPL/WEP-30day | $2.61 \times 10^{-10}$ | 1.00 | $1.90 \times 10^6$ | $2.57 \times 10^{-8}$  | 0.38 | $6.50 \times 10^7$    | 7.65  | $9.38 \times 10^{-3}$ |

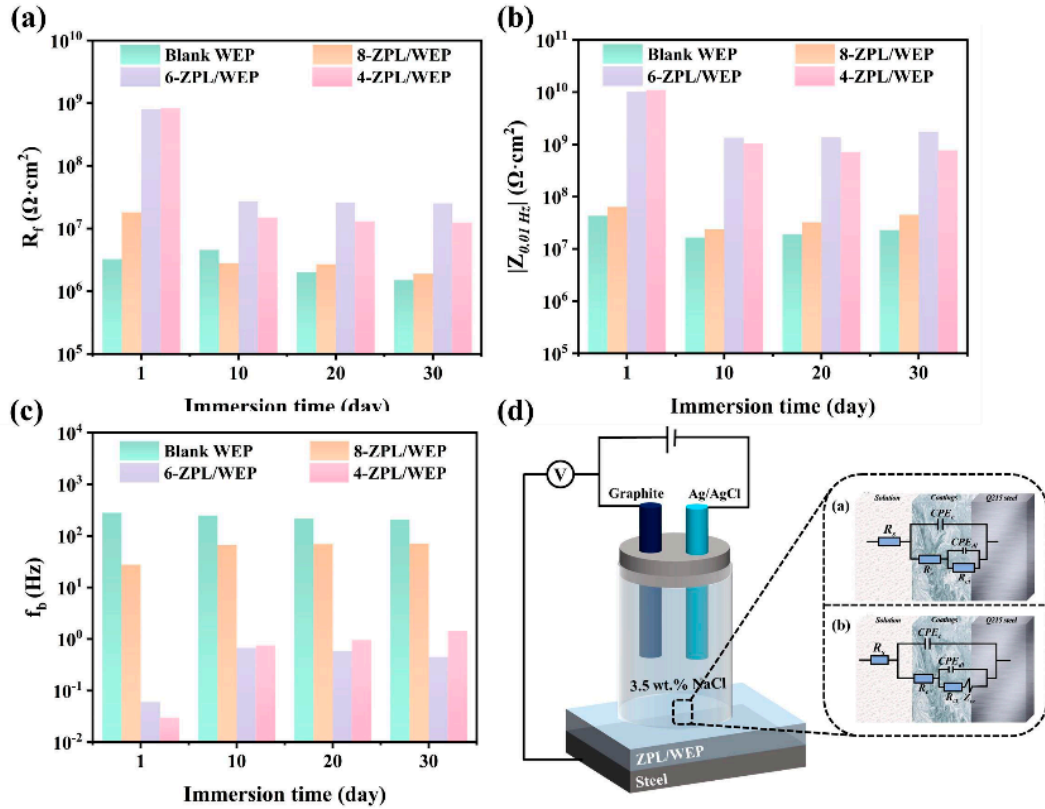

**Figure S3.** The changes of (a)  $R_f$  values, (b)  $|Z_{0.01 \text{ Hz}}|$  values, (c)  $f_b$  values; (d) the equivalent electrical circuits.
